# Supplementary material for: Peptide-linked porphyrin sensitiser and colloidal Pt or Ir catalyst in the H2 formation reaction
Source: Royal Society of Chemistry journal article supplement (doi:10.1039/c1pp05250k), 2011-11-22
Supplement: c1pp05250k.pdf [file c1pp05250k.pdf]

Electronic Supplementary Information (ESI) for Photochemical & Photobiological Sciences

## Peptide-linked porphyrin sensitiser and colloidal Pt or Ir catalyst in the H<sub>2</sub> formation reaction

Toru Arai,<sup>\*a</sup> Seigo Matsumoto,<sup>a</sup> Nao Obata,<sup>b</sup> Tamaki Kato<sup>b</sup> and Norikazu Nishino<sup>b</sup>

<sup>a</sup> Faculty of Engineering, Kyushu Institute of Technology, Kitakyushu, 804-8550, Japan. Fax: +81 93-884-3300; Tel: +81 93-884-3300; E-mail: arai@che.kyutech.ac.jp

<sup>b</sup> Graduate School of Life Science and Systems Engineering, Kyushu Institute of Technology, 808-0196, Kitakyushu, Japan

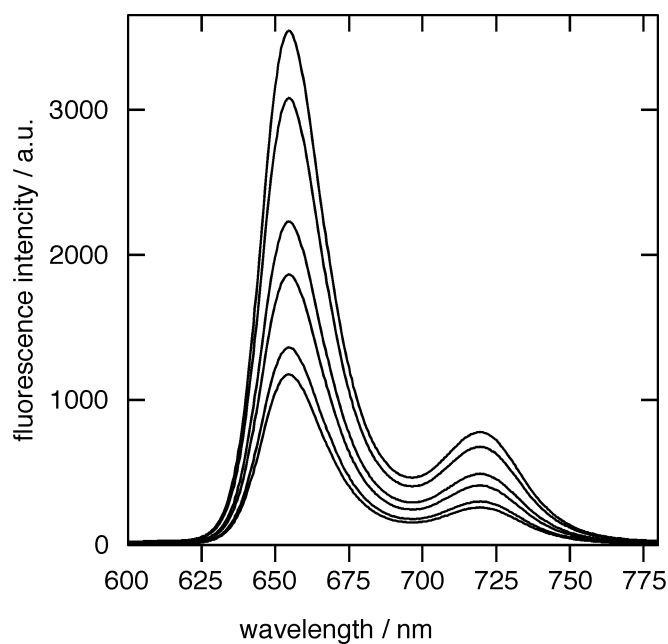

**Fig. S1** Fluorescence emission spectra of **2** (1.5 μmol L<sup>-1</sup>) in pH 7.0 buffer solution/EtOH/DMF (64:22:14) excited at 553 nm in the presence of 0, 50, 100, 150, 250 and 350 μmol L<sup>-1</sup> Ir-*p*Glu.

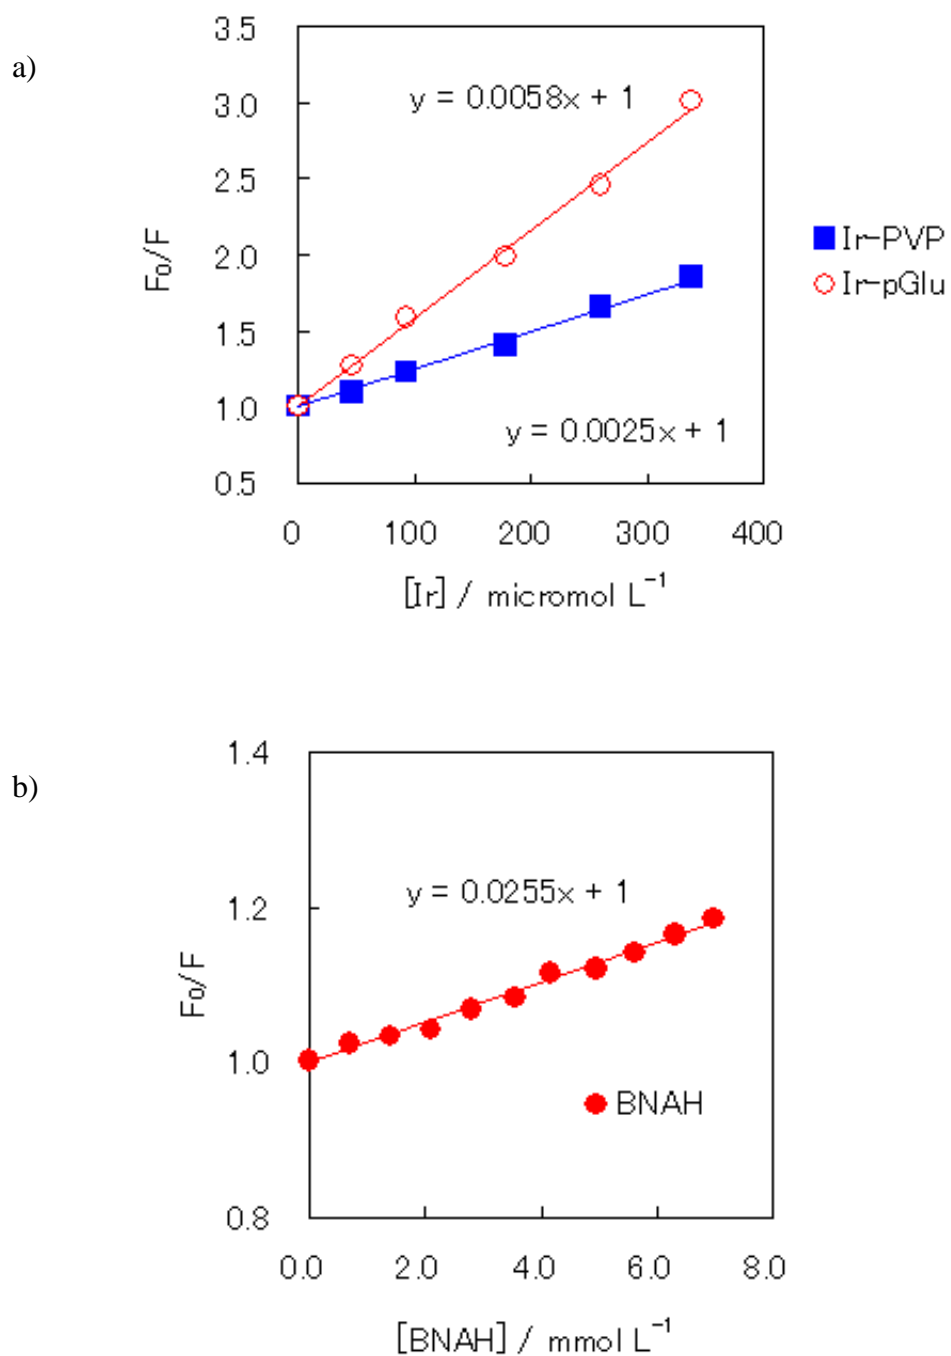

**Fig. S2** Stern-Volmer plots for the fluorescence quenching of **2** ( $1.5 \mu\text{mol L}^{-1}$ ) in pH 7.0 buffer solution/EtOH/DMF (64:22:14) excited at 553 nm in the presence of a) 0, 50, 100, 150, 250 and  $350 \mu\text{mol L}^{-1}$  Ir-*p*Glu (blue square) and Ir-PVP (red circle) and b) 0, 0.70, 1.4, 2.1, 2.8, 3.5, ... 5.6, 6.3 and  $7.0 \text{ mmol L}^{-1}$  BNAH.
